# Supplementary material for: Genetic Potential of Dissulfurimicrobium hydrothermale, an Obligate Sulfur-Disproportionating Thermophilic Microorganism
Source: MDPI journal article supplement (doi:10.3390/microorganisms10010060), 2021-12-28
Supplement: s1 [file s1]

# **Complete genome sequence analysis of *Dissulfurimicrobium hydrothermale*, a thermophilic sulfur-disproportionating microorganism**

Stéven Yvenou<sup>1</sup>, Maxime Allieux<sup>1</sup>, Alexander Slobodkin<sup>2</sup>, Galina Slobodkina<sup>2</sup>, Mohamed Jebbar<sup>1</sup> and Karine Alain<sup>1\*</sup>

<sup>1</sup>Univ Brest, CNRS, IFREMER, IRP 1211 MicrobSea, Laboratoire de Microbiologie des Environnements Extrêmes LM2E, IUEM, Rue Dumont d'Urville, F-29280 Plouzané, France

<sup>2</sup>Winogradsky Institute of Microbiology, Research Center of Biotechnology of the Russian Academy of Sciences, Moscow, Russia

\*Correspondence: Karine.Alain@univ-brest.fr

**Supplementary materials:**

**Table S1.** List of CDSs present in *Dissulfurimicrobium hydrothermale* Sh68<sup>T</sup> genome that are predicted to belong to the flagellar apparatus.

| Protein predicted by MaGe, PGAP, and/or PROKKA        | Locus tag     |
|-------------------------------------------------------|---------------|
| flagellar assembly protein FliW                       | LGS26_00010   |
| flagellar hook-associated protein FlgL                | LGS26_00020   |
| flagellar hook-associated protein FlgK                | LGS26_00025   |
| flagellar basal body P-ring protein FlgI              | LGS26_00040   |
| flagellar basal body L-ring protein FlgH              | LGS26_00045   |
| flagellar basal body P-ring formation chaperone FlgA  | LGS26_00050   |
| flagellar basal-body rod protein FlgG                 | LGS26_00055   |
| flagellar basal-body rod protein FlgF                 | LGS26_00060   |
| flagellar hook-length control protein FliK            | LGS26_00070   |
| flagellar export protein FliJ                         | LGS26_00260   |
| flagellar motor switch protein FliG                   | LGS26_00275   |
| flagellar M-ring protein FliF                         | LGS26_00280   |
| flagellar hook-basal body complex protein FliE        | LGS26_00285   |
| flagellar basal body rod protein FlgC                 | LGS26_00290   |
| flagellar basal body rod protein FlgB                 | LGS26_00295   |
| flagellar hook-length control protein FliK            | LGS26_00715   |
| flagellar hook protein FlgE                           | LGS26_00725   |
| flagellar filament capping protein FliD               | LGS26_05110   |
| flagellar protein FliS                                | LGS26_05115   |
| flagellar protein FlaG                                | LGS26_05125   |
| flagellar biosynthesis anti-sigma factor FlgM         | LGS26_07230   |
| flagellar basal body-associated FliL family protein   | LGS26_08330   |
| flagellar motor switch protein FliM                   | LGS26_08335   |
| flagellar motor switch protein FliN                   | LGS26_08340   |
| flagellar biosynthetic protein FliO                   | LGS26_08345   |
| flagellar type III secretion system pore protein FliP | LGS26_08350   |
| flagellar biosynthesis protein FliQ                   | LGS26_08355   |
| flagellar biosynthetic protein FliR                   | LGS26_08360   |
| flagellar biosynthesis protein FliH                   | LGS26_08365   |
| flagellar biosynthesis protein FliA                   | LGS26_08370   |
| flagellar motor stator protein MotA                   | LGS26_09330   |
| FliI/YscN family ATPase                               | LGS26_00265   |
| Flagellar basal-body rod modification protein FlgD    | (LGS26_00720) |

**Table S2.** List of CDSs present in *Dissulfurimicrobium hydrothermale* Sh68<sup>T</sup> genome that are predicted to belong to the secretions systems.

| Protein predicted by MaGe, PGAP, and/or PROKKA                                  | Locus tag   |
|---------------------------------------------------------------------------------|-------------|
| EscU/YscU/HrcU family type III secretion system export apparatus switch protein | LGS26_00065 |
| type II secretion system GspH family protein                                    | LGS26_01270 |
| type II secretion system major pseudopilin GspG                                 | LGS26_01680 |
| type II secretion system ATPase GspE                                            | LGS26_01685 |
| type II secretion system F family protein                                       | LGS26_01690 |
| type II secretion system GspH family protein                                    | LGS26_01700 |
| general secretion pathway protein GspK                                          | LGS26_01710 |
| type II secretion system secretin GspD                                          | LGS26_01725 |
| HlyD family secretion protein                                                   | LGS26_04385 |
| type II secretion system F family protein                                       | LGS26_04975 |
| flagellar type III secretion system pore protein FlpP                           | LGS26_08350 |
| type II secretion protein                                                       | LGS26_08815 |

**Table S3.** List of CDSs present in *Dissulfurimicrobium hydrothermale* Sh68<sup>T</sup> genome that are predicted to belong to the pili systems.

| Protein predicted by MaGe, PGAP, and/or PROKKA                          | Locus tag   |
|-------------------------------------------------------------------------|-------------|
| PilT/PilU family type 4a pilus ATPase                                   | LGS26_05470 |
| type IV pilus twitching motility protein PilT                           | LGS26_05475 |
| PilZ domain-containing protein                                          | LGS26_05835 |
| pilus assembly protein PilM                                             | LGS26_06170 |
| PilN domain-containing protein                                          | LGS26_06175 |
| type 4a pilus biogenesis protein PilO                                   | LGS26_06180 |
| pilus assembly protein PilP                                             | LGS26_06185 |
| pilus (MSHA type) biogenesis protein MshL                               | LGS26_06195 |
| PilZ domain-containing protein                                          | LGS26_07805 |
| prepilin-type N-terminal cleavage/methylation domain-containing protein | LGS26_01270 |
| type II secretion system major pseudopilin GspG                         | LGS26_01680 |
| prepilin-type N-terminal cleavage/methylation domain-containing protein | LGS26_01695 |
| prepilin-type N-terminal cleavage/methylation domain-containing protein | LGS26_01705 |
| PilN domain-containing protein                                          | LGS26_01715 |
| PilZ domain-containing protein                                          | LGS26_02065 |
| prepilin-type N-terminal cleavage/methylation domain-containing protein | LGS26_02310 |
| prepilin-type N-terminal cleavage/methylation domain-containing protein | LGS26_02315 |
| Flp pilus assembly complex ATPase component TadA                        | LGS26_03090 |
| pilus assembly protein PilX                                             | LGS26_03335 |
| prepilin-type N-terminal cleavage/methylation domain-containing protein | LGS26_03340 |
| prepilin-type N-terminal cleavage/methylation domain-containing protein | LGS26_03345 |
| prepilin-type N-terminal cleavage/methylation domain-containing protein | LGS26_03350 |
| pilus (MSHA type) biogenesis protein MshL                               | LGS26_05000 |
| Type IV pilus assembly protein PilC                                     | LGS26_02890 |
| Type IV fimbrial assembly, ATPase PilB                                  | LGS26_04970 |
